# Supplementary material
Source: PubMed Central journal article supplement (PMC6171800)
Supplement: jciinsight-3-122525-s209.pdf [file jciinsight-3-122525-s209.pdf]

## **SUPPLEMENTARY MATERIALS**

### **Belimumab promotes negative selection of activated autoreactive B cells in systemic lupus erythematosus patients**

Weiqing Huang<sup>1,\*</sup>, Tam D. Quach<sup>1,\*</sup>, Cosmin Dascalu<sup>1</sup>, Zheng Liu<sup>1</sup>, Tungming Leung<sup>2</sup>, Miranda Byrne-Steele<sup>3</sup>, Wenjing Pan<sup>3</sup>, Qunying Yang<sup>3</sup>, Jian Han<sup>3</sup>, Martin Lesser<sup>2</sup>, Thomas L. Rothstein<sup>4</sup>, Richard Furie<sup>5</sup>, Meggan Mackay<sup>1,5</sup>, Cynthia Aranow<sup>1,5</sup> and Anne Davidson<sup>1,5</sup>

<sup>1</sup> Center for Autoimmunity and Musculoskeletal and Hematologic Diseases, Feinstein Institute for Medical Research, Manhasset, New York, NY 11030

<sup>2</sup> Biostatistics Unit, Feinstein Institute for Medical Research, Manhasset, New York, NY 11030

<sup>3</sup> HudsonAlpha Institute for Biotechnology, Huntsville AL

<sup>4</sup> Western Michigan University Homer Stryker M.D. School of Medicine, Kalamazoo, MI 49007

<sup>5</sup> Donald and Barbara Zucker School of Medicine at Hofstra/Northwell, Northwell Health, Great Neck, NY 11030

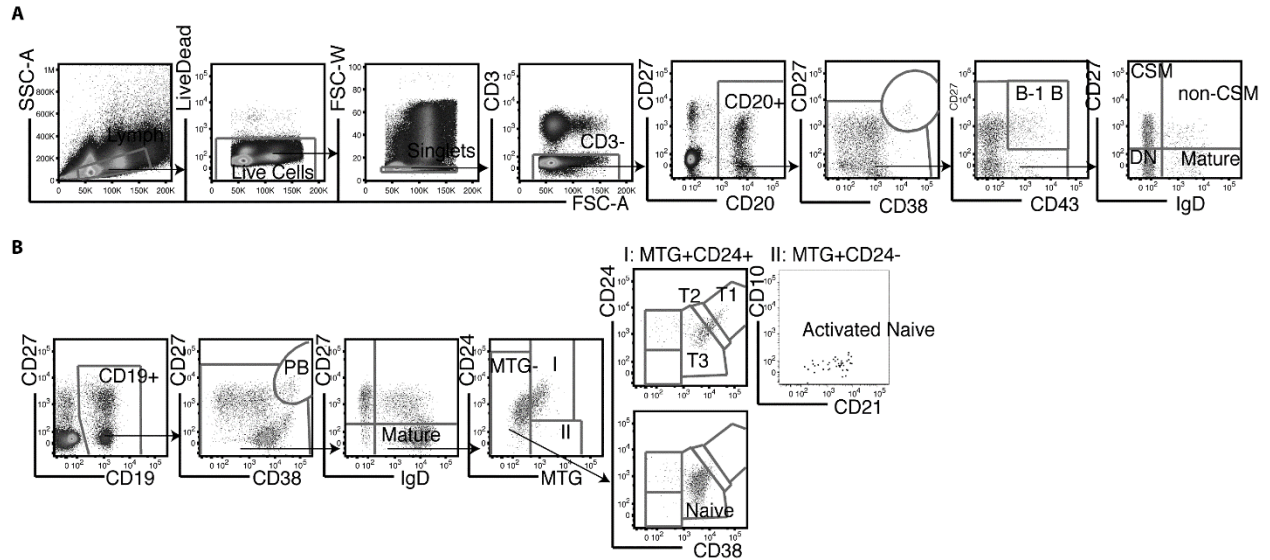

**Supplementary Figure 1: Gating strategy.** (A) Plots show the gating strategy for major B cell populations, including CD27-IgD<sup>+</sup> (transitional and naïve), CD27<sup>+</sup>IgD<sup>+</sup> (unswitched memory - non-CSM) CD27<sup>+</sup>IgD<sup>-</sup> (switched memory - CSM) and CD27-IgD<sup>-</sup> (double negative - DN) B cells as well as CD20<sup>+</sup>CD38<sup>hi</sup>CD27<sup>hi</sup> (pre-plasmablast and plasmablast) and CD20<sup>+</sup>CD27<sup>+</sup>CD43<sup>+</sup> (B1) B cells. (B) Plots show the gating strategy for major B cell populations, including CD27-IgD<sup>+</sup> (transitional and naïve), CD27<sup>+</sup>IgD<sup>+</sup> (unswitched memory) CD27<sup>+</sup>IgD<sup>-</sup> (switched memory) and CD27-IgD<sup>-</sup> (double negative - DN) B cells and CD19<sup>+</sup>CD27<sup>hi</sup>CD38<sup>hi</sup> CD38<sup>hi</sup>CD27<sup>hi</sup> (pre-plasmablast and plasmablast - PB). From the mature CD27-IgD<sup>+</sup> B cell compartment, cells were further subsetted into transitional T1 (MTG<sup>+</sup>CD38<sup>+++</sup>CD24<sup>+++</sup>), T2 (MTG<sup>+</sup>CD38<sup>++</sup>CD24<sup>++</sup>), T3 (MTG<sup>+</sup>CD38<sup>+</sup>CD24<sup>+</sup>), activated naïve (MTG<sup>+</sup>CD24<sup>-</sup>), naïve (MTG<sup>-</sup>) and MTG<sup>+</sup>CD24<sup>+</sup>CD38<sup>-</sup> B cells.

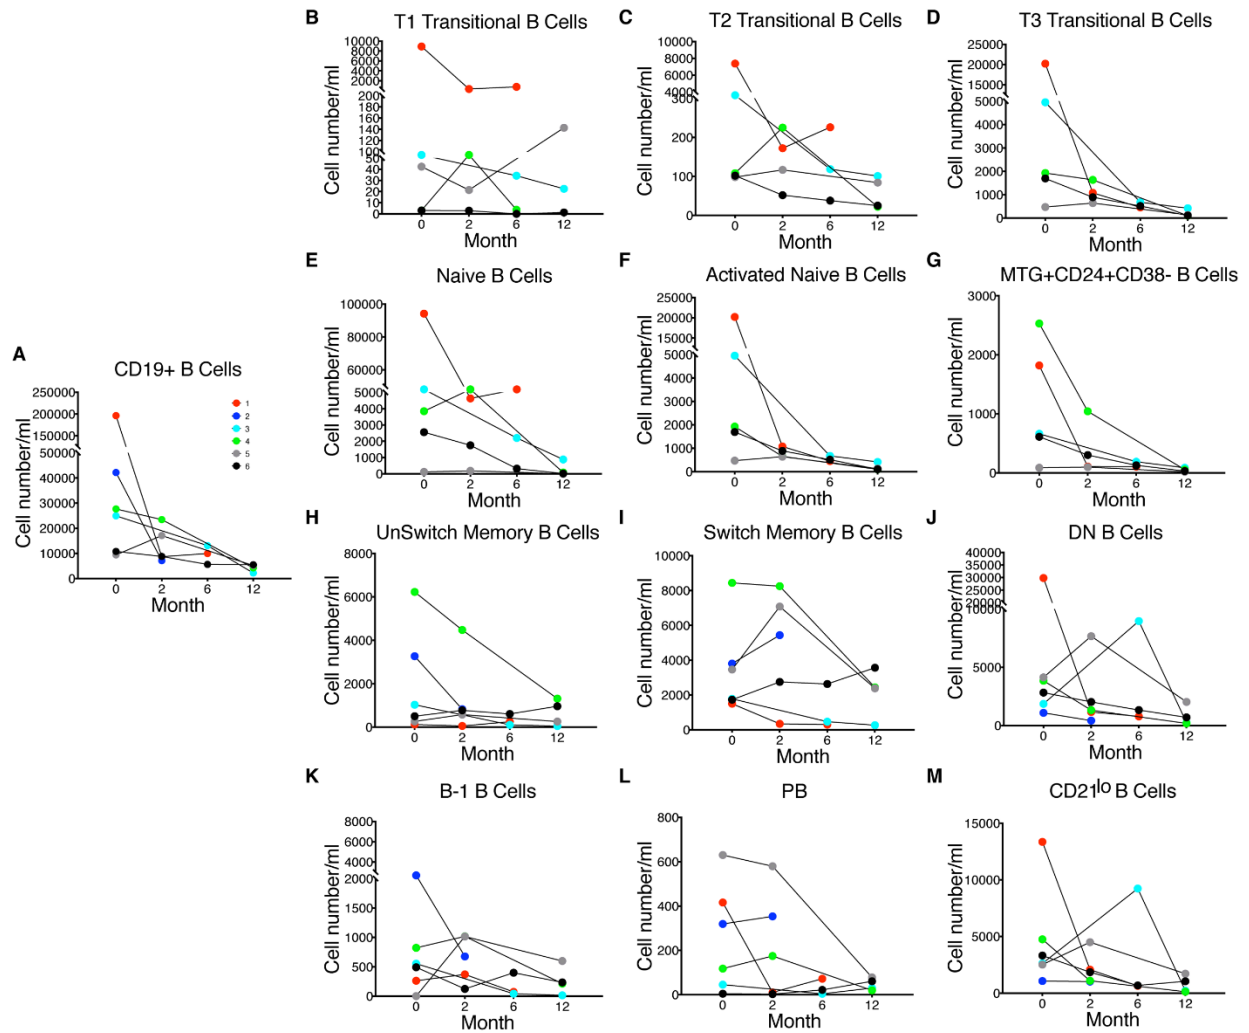

**Supplementary Figure 2: Comparison of absolute B cell count/ml before and after belimumab treatment.** Connected dot graphs show changes in the number of total B cells (A), and B cell subsets (B-M) at indicated times (in months) after treatment. Each color represents an individual donor.

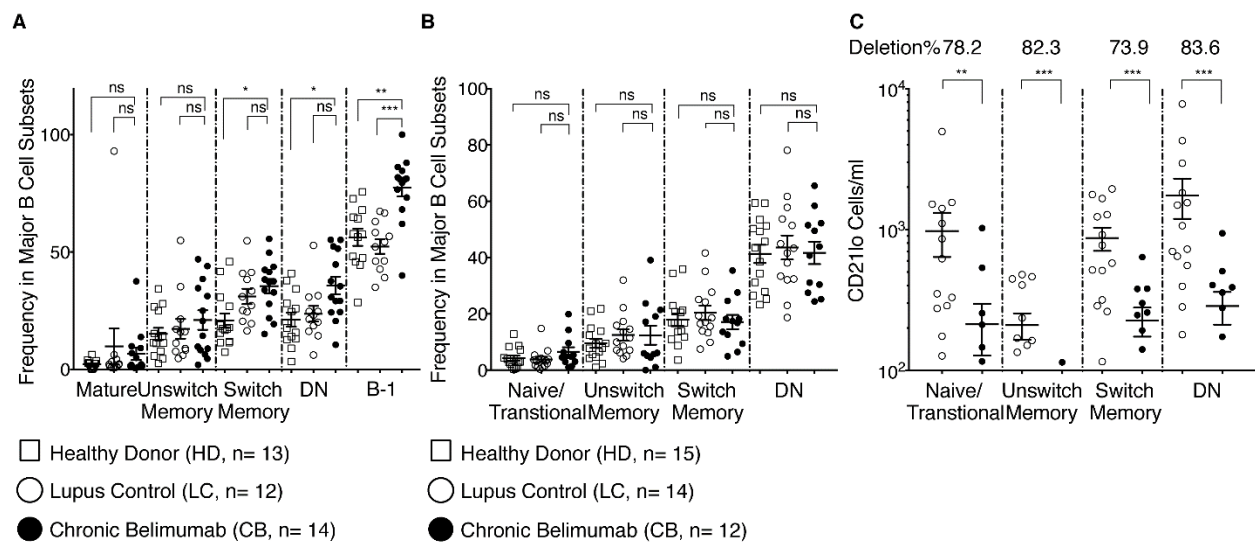

**Supplementary Figure 3: The frequency and number of CD95 and CD21 expressing B cell subsets. A-C.** The frequency and number of CD95 and CD21 expressing B cell subsets. Percent (A) of CD95 positive B cells within the major subsets (HD: n=13, LC: n=12, CB: n=14). Frequency (B) and total number (C) of CD21<sup>lo</sup> cells in major subsets of B cells (HD: n=15, LC: n=14, CB: n=12). \*p < 0.05; \*\*p < 0.01; \*\*\*p < 0.001; \*\*\*\*p < 0.0001; ns: not significant. Comparisons were performed using Mann Whitney analysis (Suppl Fig 3C) and Kruskal-Wallis Test (Suppl Fig 3A and 3B).

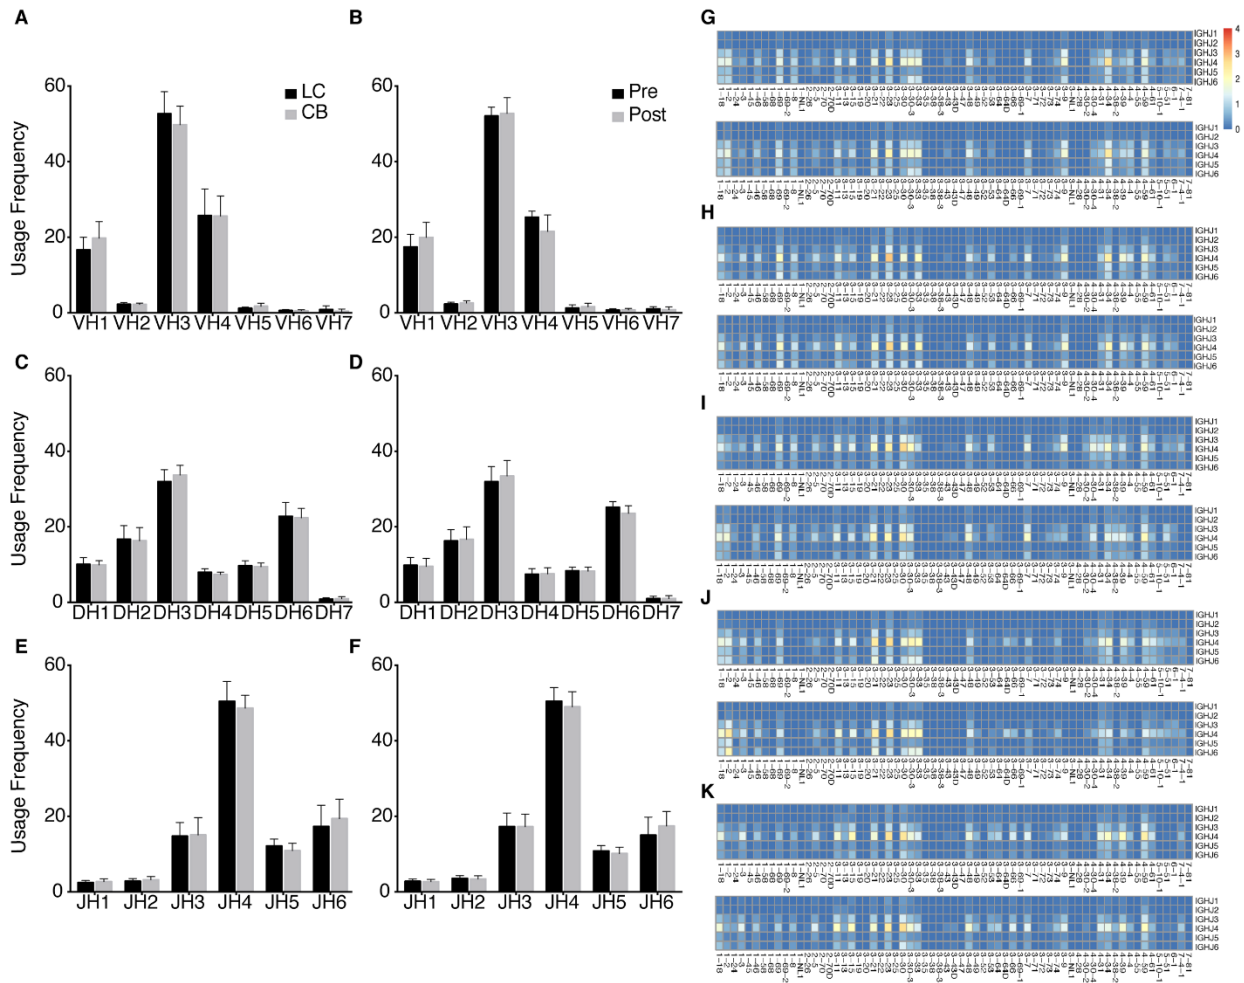

**Supplementary Figure 4: VH, DH, JH and VH-JH paired usage.** Bar graphs show frequencies of VH, DH and JH family usage in patients with (n=14) and without (n=10) belimumab treatment (A, C, E) and 5 individual patients before and after 6 months of treatment (B, D, F). Heatmaps (G-K) show the VH-JH paired usage from individual patients before (top) and after (bottom) treatment.

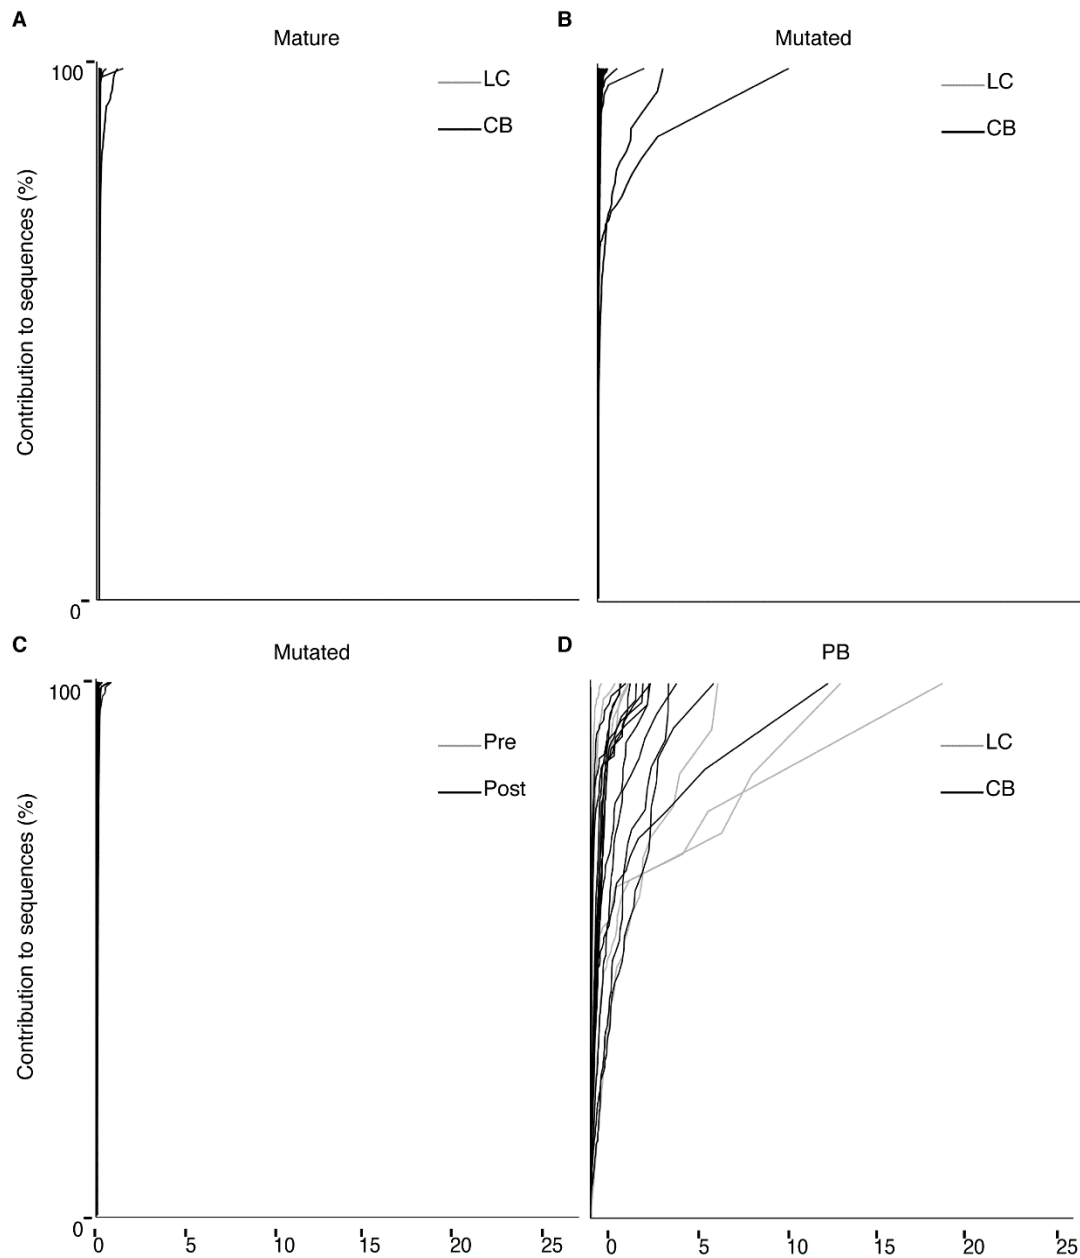

**Supplementary Figure 5: Clonotype distribution of different B cell subsets with and without treatment.** Clonotype size ranking is shown on the y-axis, and the frequency of sequences for each clone as a percent of total repertoire is shown on the x-axis. Each line represents an individual patient (lupus control (LC) n=10; chronic belimumab (CB) n=14; pre and post belimumab n=5).

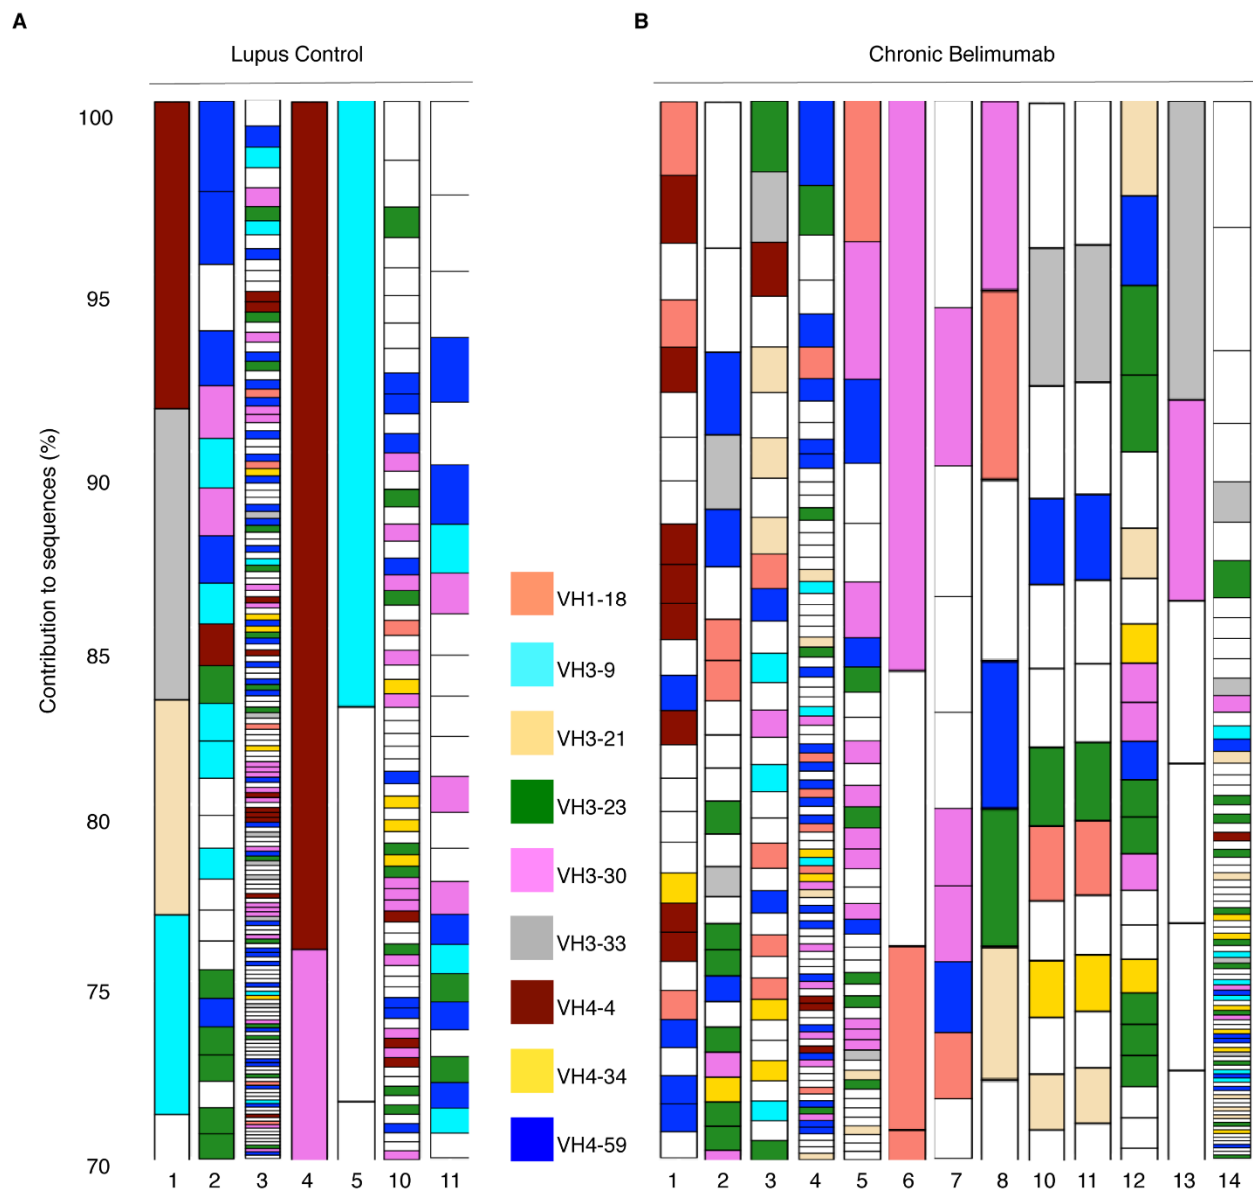

**Supplementary Figure 6. Clonal representation of PB in patients with and without belimumab treatment.** Stacked bar graphs display the size distribution of the most common individual clonotypes constituting 30% of the repertoire (D30) of plasmablasts from (A) lupus controls (n=7) and (B) chronic belimumab-treated patients (n=13). Individual donors are shown at the bottom of each graph and the most frequently represented VH are color coded. Comparisons of individual genes were performed using Mann Whitney analysis.

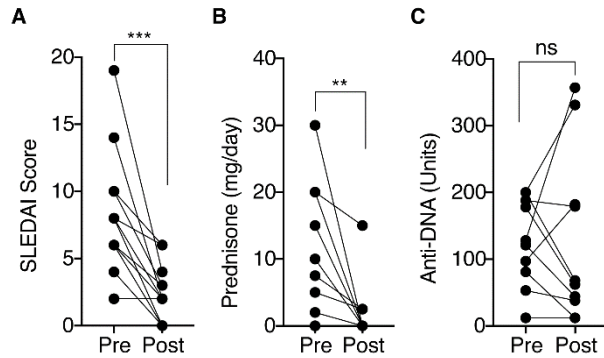

**Supplementary Figure 7.** Characteristics of chronic belimumab treated patients at inception.

Data from the pre-belimumab screening visit are compared with the study visit (n=15). After >7 years of belimumab treatment patients manifested a significant decrease in SLEDAI score and prednisone dose but changes in anti-dsDNA antibody titers were variable. Comparisons were performed using Wilcoxon Signed Rank test for paired samples. \* $p < 0.05$ ; \*\* $p < 0.01$ ; \*\*\* $p < 0.001$ ; \*\*\*\* $p < 0.0001$ ; ns: not significant.

**Supplementary Table 1: Antibodies used for flow cytometry and sorting**

| Panel 1            | Source          | Catalog   | Clone       |
|--------------------|-----------------|-----------|-------------|
| Mitotracker green  | Invitrogen      | M-7514    |             |
| IgD PE             | BD              | BD 555779 | IA6-2       |
| CD3 PE/Texas Red   | Beckman Coulter | IM2705U   | UCHT1       |
| CD38 PerCP/Cy5.5   | Beckman Coulter | A70205    | LS198.4.3   |
| CD21 PECy7         | BD              | BD 561374 | B-ly4       |
| CD27 APC           | Beckman Coulter | B09983    | 1A4CD27     |
| CD10 APC/AF700     | Beckman Coulter | A86353    | ALB1        |
| CD24 APC/AF750     | Beckman Coulter | B10738    | ALB9        |
| CD19 V450          | BD              | BD 560354 | HIB19       |
| Live/Dead Aqua     | Invitrogen      | L34957    |             |
|                    |                 |           |             |
| Panel 2            |                 |           |             |
| IgM FITC           | BD              | BD 555782 | G20-127     |
| CD38 APC/AF700     | Beckman Coulter | B23489    | LS198.4.3   |
| CD3 PE/Texas Red   | Beckman Coulter | IM 27050  | UCHT1       |
| CD95 PerCP/Cy5.5   | BD              | BD 561655 | DX2         |
| IgD PE Cy7         | BD              | BD 561314 | IA6-2       |
| CD27 APC           | Beckman Coulter | B09983    | 1A4CD27     |
| TACI PE            | BD              | BD 558414 | 1A1-K21-M22 |
| CD43 APC.AF750     | Beckman Coulter | A89307    | DFT1        |
| CD20 Pacific Blue  | BioLegend       | 302320    | 2H7         |
| Live/Dead Aqua     | Invitrogen      | L34957    |             |
|                    |                 |           |             |
| Sorting Panel      |                 |           |             |
| CD19 PE Cy7        | BD              | 341103    | SJ25C1      |
| CD27 APC           | Beckman Coulter | B09983    | 1A4CD27     |
| IgD PE             | BD              | 555779    | IA6-2       |
| CD38 PerCP/Cy5.5   | Beckman Coulter | A70205    | LS198.4.3   |
| IgM FITC           | BD              | 555782    | G20-127     |
| CD10 APC/AF750     | Beckman Coulter | A889310   | ALB1        |
| CD43 APC/AF750     | Beckman Coulter | A89307    | DFT1        |
| CD11b Pacific Blue | BD              | 558123    | ICRF44      |
| CD56 V450          | BD              | 560361    | B159        |
| CD3 Pacific Blue   | BD              | 558117    | UCHT1       |

**Supplementary Table 2: Summary of sequences at each stage of analysis per donor**

| CD27- Cells: LC vs CB               |        |         |                      |                                   |                         |                                 |                                  |                                 |                          |
|-------------------------------------|--------|---------|----------------------|-----------------------------------|-------------------------|---------------------------------|----------------------------------|---------------------------------|--------------------------|
| ID                                  | Cells  | Reads   | Productive Sequences | Mature(<4 Mutations) <sup>A</sup> | Mutated <sup>B</sup>    | MatureUniq CDR3VDJ <sup>C</sup> | MutatedUniq CDR3VDJ <sup>D</sup> | Mutated Clone 0.85 <sup>D</sup> | Mutated D20 <sup>E</sup> |
| CB1                                 | 68241  | 235401  | 117902               | 89770                             | 28132                   | 27988                           | 13167                            | 12007                           | 358                      |
| CB2                                 | 25340  | 213666  | 97555                | 68321                             | 29234                   | 13896                           | 8782                             | 6836                            | 144                      |
| CB3                                 | 199459 | 212373  | 149315               | 135193                            | 14122                   | 67937                           | 12227                            | 12037                           | 993                      |
| CB4                                 | 25214  | 117312  | 53449                | 45866                             | 7583                    | 11572                           | 4279                             | 4003                            | 101                      |
| CB5                                 | 72850  | 212545  | 142107               | 128857                            | 13250                   | 50672                           | 10968                            | 10713                           | 671                      |
| CB6                                 | 38642  | 228491  | 130188               | 118281                            | 11907                   | 32859                           | 8767                             | 8473                            | 361                      |
| CB7                                 | 52159  | 122027  | 62587                | 46666                             | 15921                   | 18555                           | 6993                             | 6191                            | 3                        |
| CB8                                 | 10641  | 291917  | 97002                | 77115                             | 19887                   | 12295                           | 5885                             | 4750                            | 7                        |
| CB9                                 | 40824  | 133403  | 82187                | 64929                             | 17258                   | 20455                           | 8811                             | 7997                            | 245                      |
| CB10                                | 26727  | 111993  | 66878                | 60109                             | 6769                    | 21086                           | 5443                             | 5306                            | 256                      |
| CB11                                | 154436 | 142253  | 87278                | 80460                             | 6818                    | 29818                           | 5881                             | 5779                            | 478                      |
| CB12                                | 84132  | 631989  | 342526               | 295882                            | 46644                   | 80993                           | 32183                            | 29954                           | 875                      |
| CB13                                | 37832  | 414721  | 216548               | 197236                            | 19312                   | 41666                           | 13205                            | 12606                           | 2327                     |
| CB14                                | 48213  | 503570  | 259373               | 227004                            | 32369                   | 56579                           | 20698                            | 19302                           | 289                      |
| LC1                                 | 749220 | 153828  | 106727               | 97255                             | 9472                    | 54277                           | 7692                             | 7547                            | 432                      |
| LC2                                 | 301686 | 468192  | 314531               | 266314                            | 48217                   | 156396                          | 37309                            | 34709                           | 1386                     |
| LC3                                 | 1E+06  | 201513  | 90635                | 81439                             | 9196                    | 53368                           | 7713                             | 7510                            | 547                      |
| LC4                                 | 631028 | 198173  | 151369               | 142799                            | 8570                    | 98195                           | 7970                             | 7902                            | 994                      |
| LC5                                 | 251900 | 373421  | 232126               | 203841                            | 28285                   | 91367                           | 23165                            | 22078                           | 1201                     |
| LC6                                 | 1E+06  | 241943  | 132564               | 116593                            | 15971                   | 39382                           | 9965                             | 9365                            | 255                      |
| LC7                                 | 179823 | 578097  | 377849               | 315964                            | 61885                   | 117536                          | 39431                            | 35703                           | 831                      |
| LC8                                 | 1E+06  | 303041  | 228547               | 212554                            | 15993                   | 98751                           | 14078                            | 13849                           | 1081                     |
| LC9                                 | 63199  | 227353  | 147264               | 126996                            | 20268                   | 39105                           | 11234                            | 10184                           | 128                      |
| LC10                                | 1E+06  | 338344  | 256174               | 227263                            | 28911                   | 111551                          | 22090                            | 21101                           | 1055                     |
| CD27- Cells: Pre vs. Post Treatment |        |         |                      |                                   |                         |                                 |                                  |                                 |                          |
| ID                                  | Cells  | Reads   | Productive Sequences | Mature(<4 Mutations) <sup>A</sup> | Mutated <sup>B</sup>    | MatureUniq CDR3VDJ <sup>C</sup> | MutatedUniq CDR3VDJ <sup>D</sup> | Mutated Clone 0.85 <sup>D</sup> | Mutated D20 <sup>E</sup> |
| Pre1                                | 280347 | 415267  | 304941               | 273387                            | 31554                   | 155363                          | 28282                            | 27335                           | 2327                     |
| Pre2                                | 307673 | 515651  | 382670               | 347876                            | 34794                   | 82314                           | 32132                            | 31125                           | 3114                     |
| Pre3                                | 128179 | 364022  | 138804               | 106908                            | 31896                   | 69231                           | 20360                            | 18908                           | 780                      |
| Pre4                                | 74266  | 314445  | 182630               | 121227                            | 61403                   | 34481                           | 22831                            | 18482                           | 243                      |
| Pre5                                | 376757 | 365427  | 244024               | 215481                            | 28543                   | 113482                          | 23379                            | 22433                           | 1385                     |
| Post1                               | 126845 | 282410  | 177495               | 151500                            | 25995                   | 57205                           | 17762                            | 16752                           | 615                      |
| Post2                               | 80067  | 490998  | 305209               | 274153                            | 31056                   | 63601                           | 21622                            | 20329                           | 678                      |
| Post3                               | 60896  | 306749  | 128338               | 83786                             | 44552                   | 17201                           | 14666                            | 11797                           | 257                      |
| Post4                               | 14703  | 314865  | 180288               | 89573                             | 90715                   | 13614                           | 15622                            | 8482                            | 132                      |
| Post5                               | 170745 | 328001  | 202810               | 136701                            | 66109                   | 51599                           | 33592                            | 29139                           | 972                      |
| Plasmablasts: LC vs. CB             |        |         |                      |                                   |                         |                                 |                                  |                                 |                          |
| ID                                  | Cells  | Reads   | Productive Sequences | UniqCDR3 VDJ <sup>C</sup>         | Clone 0.85 <sup>D</sup> | D20 <sup>E</sup>                | D50 <sup>E</sup>                 |                                 |                          |
| LC1                                 | 1896   | 24072   | 1510                 | 161                               | 122                     | 2                               | 11                               |                                 |                          |
| LC2                                 | 2382   | 193157  | 11057                | 896                               | 561                     | 12                              | 64                               |                                 |                          |
| LC3                                 | 27311  | 1010530 | 58286                | 7394                              | 5484                    | 82                              | 484                              |                                 |                          |
| LC4                                 | 411    | 5278    | 252                  | 93                                | 87                      | 1                               | 3                                |                                 |                          |
| LC5                                 | 12122  | 99575   | 5669                 | 561                               | 272                     | 1                               | 9                                |                                 |                          |
| LC10                                | 7065   | 449622  | 25270                | 2586                              | 1619                    | 34                              | 179                              |                                 |                          |
| LC11                                | 1915   | 687147  | 36609                | 2005                              | 522                     | 9                               | 46                               |                                 |                          |
| CB1                                 | 638    | 879130  | 46321                | 2494                              | 608                     | 11                              | 50                               |                                 |                          |
| CB2                                 | 1037   | 834462  | 45948                | 2858                              | 738                     | 8                               | 48                               |                                 |                          |
| CB3                                 | 1957   | 322060  | 17137                | 1384                              | 714                     | 14                              | 70                               |                                 |                          |
| CB4                                 | 5293   | 932475  | 46025                | 3836                              | 2046                    | 23                              | 176                              |                                 |                          |
| CB5                                 | 9206   | 746076  | 38484                | 4098                              | 2510                    | 6                               | 126                              |                                 |                          |
| CB6                                 | 2244   | 840141  | 43912                | 2558                              | 915                     | 1                               | 10                               |                                 |                          |
| CB7                                 | 630    | 490265  | 26195                | 1362                              | 309                     | 4                               | 20                               |                                 |                          |
| CB8                                 | 4856   | 141356  | 7584                 | 437                               | 146                     | 3                               | 13                               |                                 |                          |
| CB10                                | 1066   | 796269  | 43433                | 2279                              | 609                     | 7                               | 36                               |                                 |                          |
| CB10                                | 899    | 858262  | 47219                | 2632                              | 693                     | 5                               | 26                               |                                 |                          |
| CB11                                | 914    | 408268  | 22091                | 1543                              | 605                     | 7                               | 40                               |                                 |                          |
| CB13                                | 261    | 733574  | 42020                | 1716                              | 367                     | 2                               | 9                                |                                 |                          |
| CB14                                | 46610  | 1130375 | 61538                | 10698                             | 6722                    | 10                              | 332                              |                                 |                          |

A: Sequences with < 4 nucleotide mutations in the whole VH sequence

B: Sequences with ≥ 4 nucleotide mutations in the whole VH sequence

C: Number of sequences that are 100% identical in VH, DH, JH and CDR3

D: Number of sequences with the same VH, JH CDR3L and ≥ 85% identical in the CDR3

E: The number of clonotypes in a size-ordered list that span 20% (or 50%) of the sequences

# Supplementary Table 3: Statistics for Figure 4<sup>A</sup>

| LC: Mutated/Mature |         |        | CB: Mutated/Mature |         |        |
|--------------------|---------|--------|--------------------|---------|--------|
| VH                 | p-Value | FDR    | VH                 | p-Value | FDR    |
| IGHV1_18           | 0.0039  | 0.0105 | IGHV1_46           | 0.0004  | 0.0017 |
| IGHV1_24           | 0.0039  | 0.0105 | IGHV1_58           | 0.0052  | 0.0141 |
| IGHV1_3            | 0.0039  | 0.0105 | IGHV2_26           | 0.0002  | 0.0016 |
| IGHV1_46           | 0.0039  | 0.0105 | IGHV2_5            | 0.0002  | 0.0016 |
| IGHV1_58           | 0.0020  | 0.0105 | IGHV3_15           | 0.0006  | 0.0024 |
| IGHV1_69           | 0.0020  | 0.0105 | IGHV3_20           | 0.0005  | 0.0021 |
| IGHV2_26           | 0.0195  | 0.0412 | IGHV3_21           | 0.0004  | 0.0017 |
| IGHV2_5            | 0.0020  | 0.0105 | IGHV3_23           | 0.0001  | 0.0012 |
| IGHV2_70           | 0.0039  | 0.0105 | IGHV3_48           | 0.0009  | 0.0028 |
| IGHV3_15           | 0.0039  | 0.0105 | IGHV3_49           | 0.0001  | 0.0012 |
| IGHV3_20           | 0.0039  | 0.0105 | IGHV3_53           | 0.0004  | 0.0017 |
| IGHV3_21           | 0.0195  | 0.0412 | IGHV3_64           | 0.0009  | 0.0028 |
| IGHV3_23           | 0.0020  | 0.0105 | IGHV3_69_1         | 0.0004  | 0.0017 |
| IGHV3_30           | 0.0020  | 0.0105 | IGHV3_74           | 0.0001  | 0.0012 |
| IGHV3_49           | 0.0020  | 0.0105 | IGHV3_9            | 0.0002  | 0.0016 |
| IGHV3_53           | 0.0059  | 0.0144 | IGHV4_30_2         | 0.0085  | 0.0219 |
| IGHV3_64           | 0.0020  | 0.0105 | IGHV4_30_4         | 0.0052  | 0.0141 |
| IGHV3_69_1         | 0.0039  | 0.0105 | IGHV4_34           | 0.0001  | 0.0012 |
| IGHV3_73           | 0.0098  | 0.0230 | IGHV4_39           | 0.0203  | 0.0478 |
| IGHV3_74           | 0.0020  | 0.0105 | IGHV4_4            | 0.0023  | 0.0068 |
| IGHV3_9            | 0.0039  | 0.0105 | IGHV4_59           | 0.0009  | 0.0028 |
| IGHV4_28           | 0.0059  | 0.0144 | IGHV5_10_1         | 0.0156  | 0.0384 |
| IGHV4_39           | 0.0020  | 0.0105 | IGHV5_51           | 0.0001  | 0.0012 |
| IGHV4_4            | 0.0195  | 0.0412 | IGHV7_4_1          | 0.0017  | 0.0053 |
| IGHV4_59           | 0.0039  | 0.0105 |                    |         |        |
| IGHV4-34           | 0.0488  | 0.0823 |                    |         |        |
| IGHV5_51           | 0.0020  | 0.0105 |                    |         |        |
| IGHV7_4_1          | 0.0039  | 0.0105 |                    |         |        |

| CB: PC/Mature <sup>B</sup> |         |        | CB: PC/Mutated <sup>B</sup> |        |        |
|----------------------------|---------|--------|-----------------------------|--------|--------|
| VH                         | p-Value | FDR    |                             |        |        |
| IGHV1_46                   | 0.0017  | 0.0154 | IGHV1_3                     | 0.0034 | 0.0185 |
| IGHV1_69                   | 0.0005  | 0.0099 | IGHV1_46                    | 0.0002 | 0.0044 |
| IGHV1_8                    | 0.0007  | 0.0099 | IGHV1_8                     | 0.0024 | 0.0185 |
| IGHV3_43                   | 0.0005  | 0.0099 | IGHV2_26                    | 0.0105 | 0.0405 |
| IGHV3_7                    | 0.0046  | 0.0313 | IGHV2_5                     | 0.0134 | 0.0453 |
| IGHV3_72                   | 0.0007  | 0.0099 | IGHV3_11                    | 0.0134 | 0.0453 |
| IGHV3_74                   | 0.0024  | 0.0188 | IGHV3_23                    | 0.0012 | 0.0132 |
| IGHV4_34                   | 0.0012  | 0.0132 | IGHV3_30                    | 0.0081 | 0.0363 |
|                            |         |        | IGHV3_43                    | 0.0034 | 0.0185 |
|                            |         |        | IGHV3_64                    | 0.0046 | 0.0228 |
|                            |         |        | IGHV3_7                     | 0.0105 | 0.0405 |
|                            |         |        | IGHV3_72                    | 0.0007 | 0.0099 |
|                            |         |        | IGHV4_39                    | 0.0034 | 0.0185 |
|                            |         |        | IGHV4_4                     | 0.0002 | 0.0044 |
|                            |         |        | IGHV4_59                    | 0.0017 | 0.0154 |
|                            |         |        | IGHV5_51                    | 0.0002 | 0.0044 |

A: only those V genes with a statistically significant p value <0.05 and false discovery rate (FDR) <0.05 are shown

B: no significant differences were seen in lupus controls
